# Supplementary material
Source: Research Square preprint supplement (doi:10.21203/rs.3.rs-8847932/v2)
Supplement: Supplementary file 1 [file 7b768f72e64ba95cda3c4d56.docx]

Table 1. Descriptive statistics.

| Sample characteristic | | Total (n = 155) | Male (n = 61) | Female (n = 94) |
| --- | --- | --- | --- | --- |
| Age (years), M (SD) | | 21.1 (4.1) | 22.4 (5.3) | 20.2 (2.7) |
| Body mass index (kg/m2), M (SD) | | 21.2 (2.8) | 21.9 (3.2) | 20.7 (2.4) |
| IAT scores, M (SD) | | 44.9 (14.6) | 44.4 (14.2) | 45.2 (15.0) |
| CES-D scores, M (SD) | | 15.3 (9.3) | 13.8 (8.2) | 16.3 (9.8) |
| Hair bleaching/dyeing, n (%) | | 54 (34.8) | 10 (16.4) | 44 (46.8) |
| Hair perming, n (%) | | 15 (9.7) | 3 (4.9) | 12 (12.8) |
| Hair washes frequency, n (%) | |  |  |  |
|  | ≤ 1 a week | 0 (0) | 0 (0) | 0 (0) |
|  | 2-3 times a week | 3 (1.9) | 1 (1.6) | 2 (2.1) |
|  | 4-5 times a week | 18 (11.6) | 8 (13.1) | 10 (10.6) |
|  | ≥ 6 times a week | 134 (86.5) | 52 (85.2) | 82 (87.2) |
| Smoking frequency, n (%) | |  |  |  |
|  | < 1 day a week | 153 (98.7) | 60 (98.4) | 93 (98.9) |
|  | 1-2 days a week | 0 (0) | 0 (0) | 0 (0) |
|  | 3-6 days a week | 2 (1.3) | 1 (1.6) | 1 (1.1) |
|  | Every day | 0 (0) | 0 (0) | 0(0) |
| Drinking frequency, n (%) | |  |  |  |
|  | < 1 day a week | 131 (84.5) | 45 (73.8) | 86 (91.5) |
|  | 1-2 days a week | 21 (13.5) | 13 (21.3) | 8 (8.5) |
|  | 3-6 days a week | 3 (1.9) | 3 (4.9) | 0 (0) |
|  | Every day | 0 (0) | 0 (0) | 0 (0) |
| Hair cortisol (pg/mg), M (SD) | | 7.23 (5.12) | 7.70 (5.62) | 6.93 (4.78) |
| Hair testosterone (pg/mg), M (SD) | | 2.39 (1.64) | 3.87 (1.59) | 1.42 (0.65) |

Note. IAT the Japanese version of the Internet Addiction Test, CES-D the Japanese version of the Center for Epidemiologic Studies Depression Scale.
