# Supplementary material
Source: Research Square preprint supplement (doi:10.21203/rs.3.rs-8847932/v2)
Supplement: Supplementary file 2 [file ea64ca7b63d9be4744e9171b.docx]

Table 3. Multivariate associations of Internet addiction symptoms with hair cortisol and testosterone concentrations, including interaction terms.

|  |  | Model including a hair cortisol × hair testosterone interaction (n = 155) | | |  | Model including hair cortisol × sex and hair testosterone × sex interactions (n = 155) | | |
| --- | --- | --- | --- | --- | --- | --- | --- | --- |
| Variables | | B | 95%CI | SE |  | B | 95%CI | SE |
| Age | | −0.29 | [−0.84, 0.25] | 0.27 |  | -0.33 | [−0.88, 0.22] | 0.28 |
| Sex | |  |  |  |  |  |  |  |
|  | Male | Ref. |  |  |  | Ref. |  |  |
|  | Female | −5.27 | [−12.52, 1.99] | 3.67 |  | −7.65 | [−16.10, 0.80] | 4.27 |
| Body mass index | | −0.02 | [−0.79, 0.75] | 0.39 |  | −0.06 | [−0.84, 0.72] | 0.39 |
| CES-D scores | | 0.75** | [0.53, 0.97] | 0.11 |  | 0.74** | [0.52, 0.97] | 0.11 |
| Hair bleaching/dyeing | | 1.96 | [−2.96, 6.89] | 2.49 |  | 2.41 | [−2.51, 7.33] | 2.49 |
| Hair perming | | −1.74 | [−9.01, 5.54] | 3.68 |  | −0.93 | [−8.17, 6.31] | 3.66 |
| Hair washes frequency | | 2.51 | [−2.53, 7.55] | 2.55 |  | 2.32 | [−2.76, 7.40] | 2.57 |
| Hair cortisol | | −10.81* | [−21.05, −0.58] | 5.18 |  | −2.74 | [−20.46, 14.98] | 8.96 |
| Hair testosterone | | −5.99 | [−19.01, 7.03] | 6.59 |  | −16.57 | [−41.76, 8.61] | 12.74 |
| Hair cortisol × Hair testosterone | | 19.72 | [−5.79, 45.23] | 12.91 |  |  |  |  |
| Hair cortisol × sex | |  |  |  |  | −12.92 | [−34.30, 8.46] | 10.82 |
| Hair testosterone × sex | |  |  |  |  | 14.96 | [−14.68, 44.59] | 14.99 |

* significant at 0.05, ** significant at 0.01.

Note. CES-D the Japanese version of the Center for Epidemiologic Studies Depression Scale.
