# Supplementary material
Source: Research Square preprint supplement (doi:10.21203/rs.3.rs-8847932/v2)
Supplement: Supplementary file 3 [file efcafb28d595443254de766b.docx]

Table 2. Univariate and multivariate associations of Internet addiction symptoms with hair cortisol and testosterone concentrations.

|  |  | Univariate analysis, winsorized (n = 155) | | |  | Multivariate analysis, winsorized (n = 155) | | |  | Multivariate analysis, outliers removed (n = 152) | | |
| --- | --- | --- | --- | --- | --- | --- | --- | --- | --- | --- | --- | --- |
| Variables | | B | 95%CI | SE |  | B | 95%CI | SE |  | B | 95%CI | SE |
| Age | | −0.55 | [−1.12, 0.02] | 0.29 |  | -0.32 | [−0.87, 0.22] | 0.28 |  | −0.27 | [−0.83, 0.28] | 0.28 |
| Sex | |  |  |  |  |  |  |  |  |  |  |  |
|  | Male | Ref. |  |  |  | Ref. |  |  |  | Ref. |  |  |
|  | Female | 0.83 | [−3.93, 5.59] | 2.41 |  | −5.46 | [−12.75, 1.82] | 3.68 |  | −5.51 | [−12.85, 1.84] | 3.72 |
| Body mass index | | −0.34 | [−1.17, 0.49] | 0.42 |  | −0.01 | [−0.79, 0.76] | 0.39 |  | −0.03 | [−0.81, 0.75] | 0.40 |
| CES-D scores | | 0.76** | [0.54, 0.98] | 0.11 |  | 0.76** | [0.54, 0.98] | 0.11 |  | 0.76** | [0.54, 0.99] | 0.11 |
| Hair bleaching/dyeing | | 0.24 | [−4.65, 5.12] | 2.47 |  | 2.46 | [−2.44, 7.37] | 2.48 |  | 2.37 | [−2.60, 7.35] | 2.52 |
| Hair perming | | 0.45 | [−7.43, 8.32] | 3.99 |  | −0.51 | [−7.64, 6.62] | 3.61 |  | −0.51 | [−7.69, 6.67] | 3.63 |
| Hair washes frequency | | 1.47 | [−4.17, 7.12] | 2.86 |  | 2.25 | [−2.80, 7.30] | 2.56 |  | 2.34 | [−2.75, 7.43] | 2.57 |
| Hair cortisol | | −11.90* | [−21.80, −2.00] | 5.01 |  | −11.79* | [−21.99, −1.58] | 5.16 |  | −11.33* | [−22.11, −0.55] | 5.46 |
| Hair testosterone | | −5.98 | [−14.27, 2.31] | 4.20 |  | −5.36 | [−18.41, 7.70] | 6.60 |  | −6.39 | [−19.85, 7.07] | 6.81 |

* significant at 0.05, ** significant at 0.01.

Note. CES-D the Japanese version of the Center for Epidemiologic Studies Depression Scale.
